# Supplementary material
Source: PubMed Central journal article supplement (PMC3406597)
Supplement: NIHMS392801-supplement-Supplementary_Figure_1.pdf [file NIHMS392801-supplement-Supplementary_Figure_1.pdf]

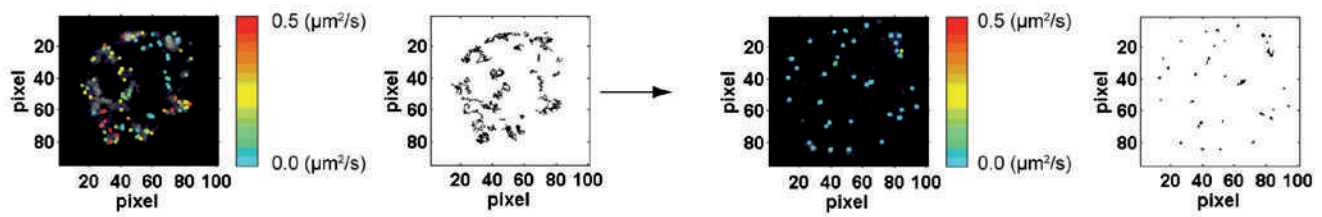

Figure 1 | **Dynamics of monomeric versus oligomeric BCRs.** Given are examples of the single particle tracking (SPT) total internal reflection fluorescence microscopy (TIRFM) results that provide evidence that B cell receptors (BCRs) are highly mobile in the monomeric resting state (left) and much less mobile in the oligomerized signalling active state (right) following antigen binding.

1. Tolar, P., Hanna, J., Krueger, P. D. & Pierce, S. K. The constant region of the membrane immunoglobulin mediates B cell-receptor clustering and signaling in response to membrane antigens. *Immunity* **30**, 44–55 (2009).
2. Liu, W., Meckel, T., Tolar, P., Sohn, H. W. & Pierce, S. K. Intrinsic properties of immunoglobulin IgG1 isotope-switched B cell receptors promote microclustering and the initiation of signaling. *Immunity* **32**, 778–789 (2010).
