# Supplementary material
Source: PubMed Central journal article supplement (PMC3406597)
Supplement: NIHMS392801-supplement-Supplementary_Figure_2.pdf [file NIHMS392801-supplement-Supplementary_Figure_2.pdf]

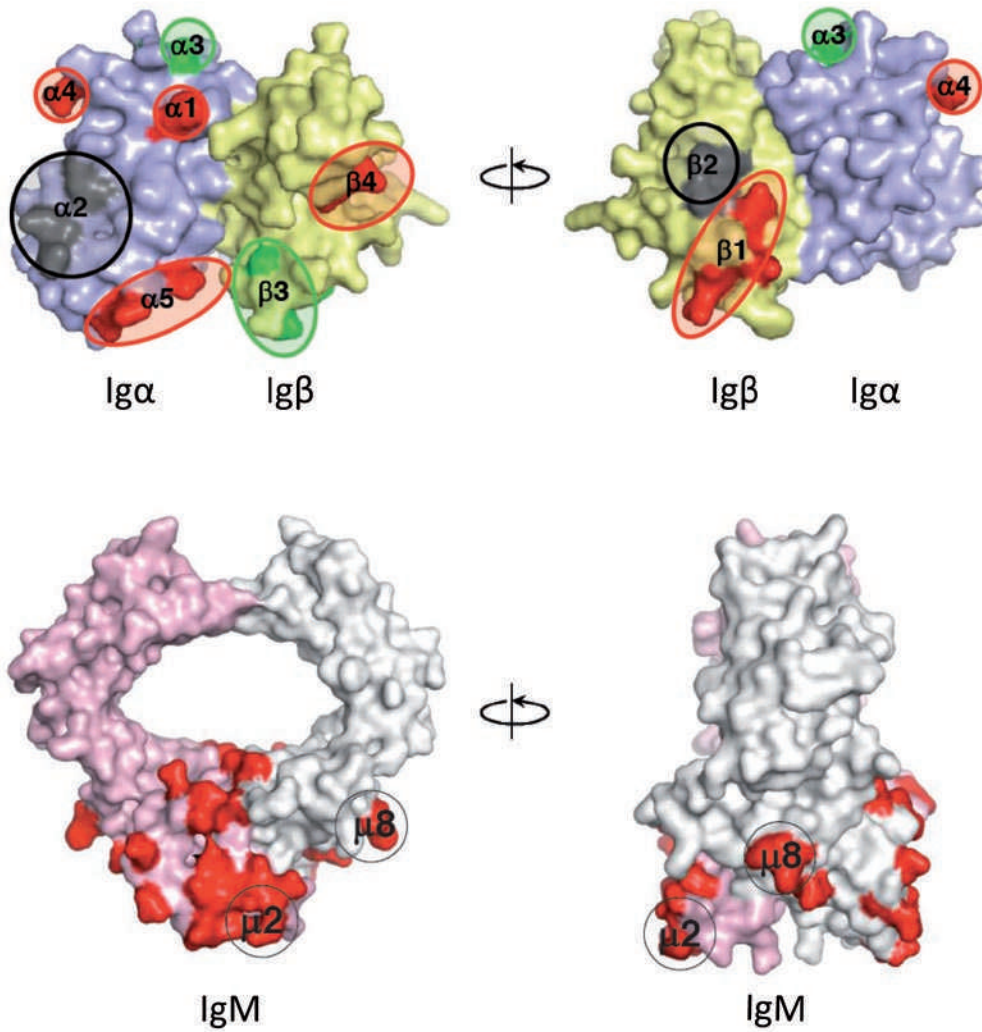

Figure 2 | **Structure of the ectodomains of an Igα-Igβ heterodimer.** Provided is an image of the recently determined structural model for the ectodomains of Igα-Igβ heterodimer and the surface of the C<sub>μ</sub>4 domain with which it interacts.

Radaev, S. *et al.* Structural and functional studies of Igαβ and its assembly with the B cell antigen receptor. *Structure* **18**, 934–943 (2010).
